# Supplementary material
Source: Springer Nature journal article supplement (https://www.springermedizin.de/resource/supplementary/12992_2014_271_MOESM1_ESM.pdf/9616248)

**Number of people on ART**

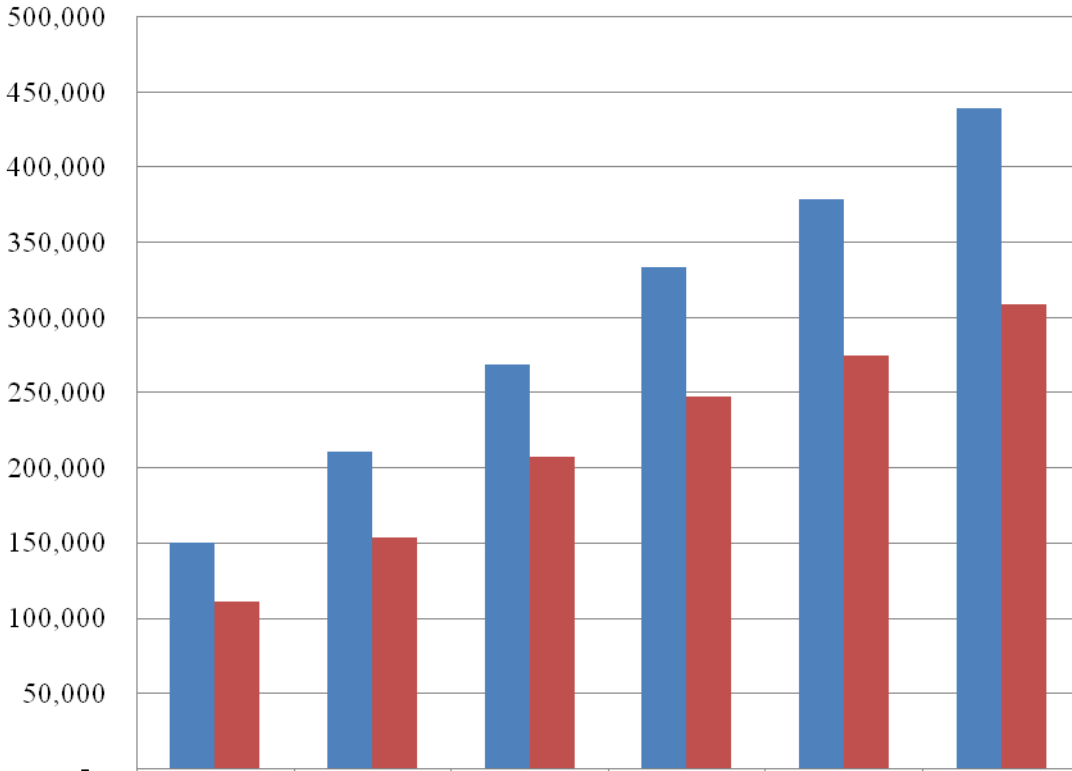

■ Ever started on ART

■ Currently on ART

|                     | 2007/8  | 2008/9  | 2009/10 | 2010/11 | 2011/12 | 2012/13 |
|---------------------|---------|---------|---------|---------|---------|---------|
| Ever started on ART | 150,136 | 210,637 | 268,934 | 333,434 | 379,190 | 439,301 |
| Currently on ART    | 110,611 | 153,741 | 207,733 | 247,805 | 274,708 | 308,880 |

Supplement: MOESM1 [file 9616248]
